# Supplementary material for: The effect of Eu3+and Gd3+co-doping on the morphology and luminescence of NaYF4:Eu3+, Gd3+phosphors
Source: Royal Society of Chemistry journal article supplement (doi:10.1039/d1nj02193a), 2021-01-01
Supplement: d1nj02193a1.pdf [file d1nj02193a1.pdf]

ELECTRONIC SUPPLEMENTARY INFORMATION

**Effect of  $\text{Eu}^{3+}$  and  $\text{Gd}^{3+}$  co-doping on morphology and luminescence of  $\text{NaYF}_4: \text{Eu}^{3+}, \text{Gd}^{3+}$  phosphors**

*Ilya E. Kolesnikov, <sup>a,b,\*</sup> Aleksandra A. Vidyakina, <sup>a</sup> Marina S. Vasileva, <sup>a</sup> Viktor G. Nosov,<sup>a</sup> Nikita A. Bogachev,<sup>a,c</sup> Vladimir B. Sosnovsky,<sup>c</sup> Mikhail Y. Skripkin,<sup>a,c</sup> Ilya I. Tumkin, <sup>a</sup> Erkki Lähderanta <sup>b</sup>, and Andrey S. Mereshchenko <sup>a,c,\*</sup>*

<sup>a</sup> Saint-Petersburg State University, 7/9 Universitetskaya emb., St. Petersburg 199034, Russia;

<sup>b</sup> LUT University, Skinnarilankatu 34, 53850 Lappeenranta, Finland;

<sup>c</sup> Sirius University of Science and Technology, 1 Olympic Ave, Sochi 354340, Russia.

The supplementary materials contain EDX spectra of synthesized samples and the content of rare earth elements in the samples extracted from EDX spectra.

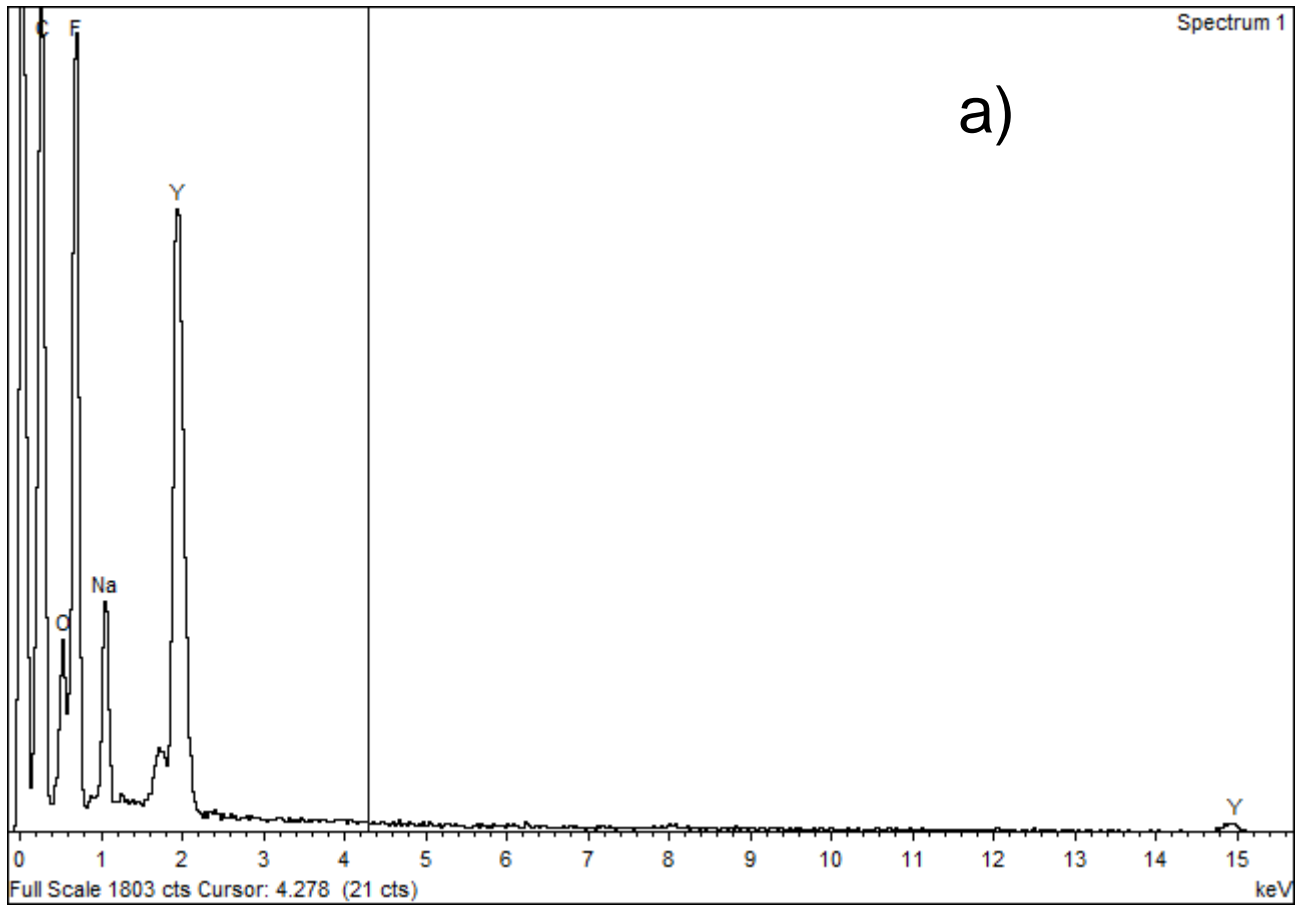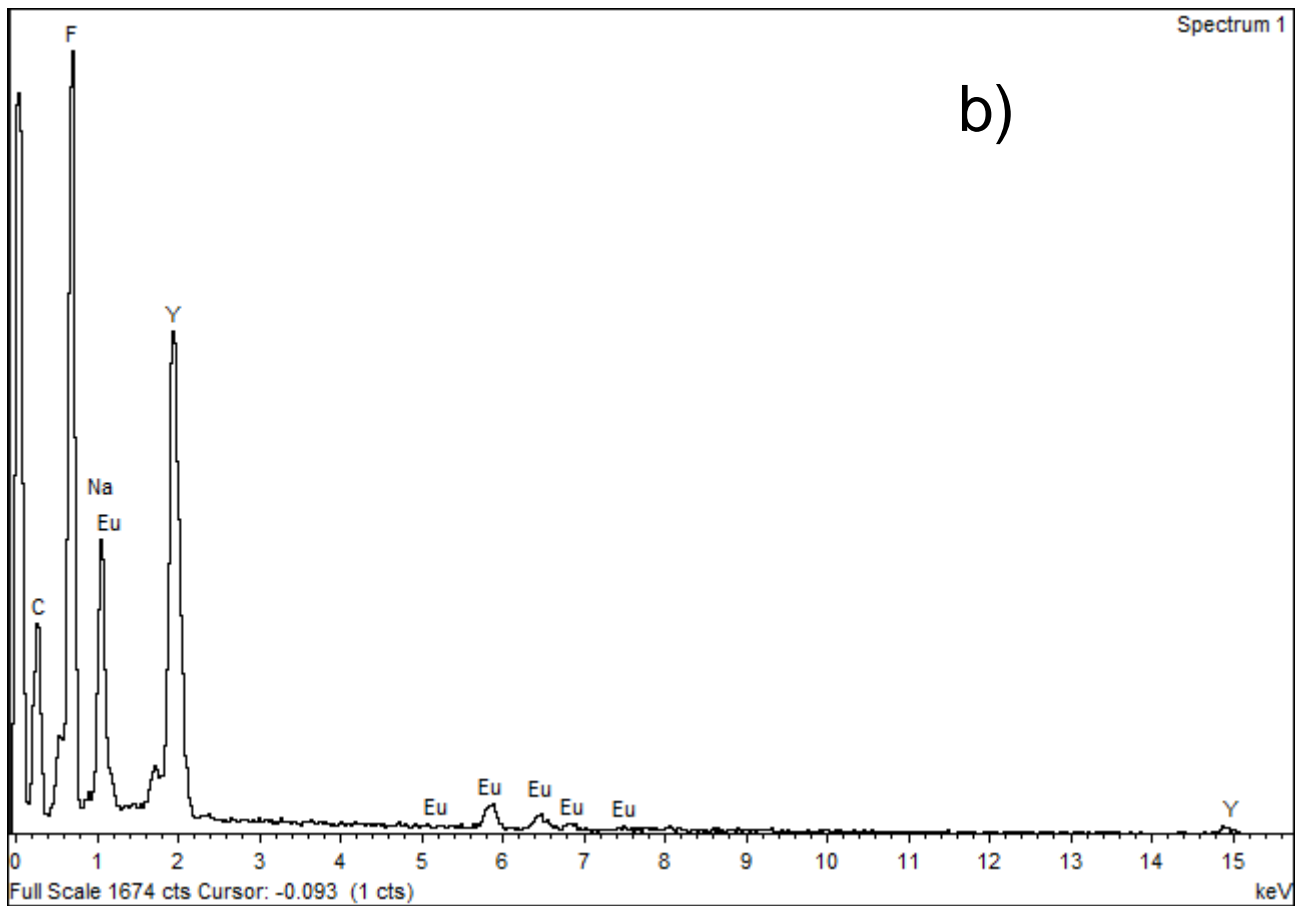

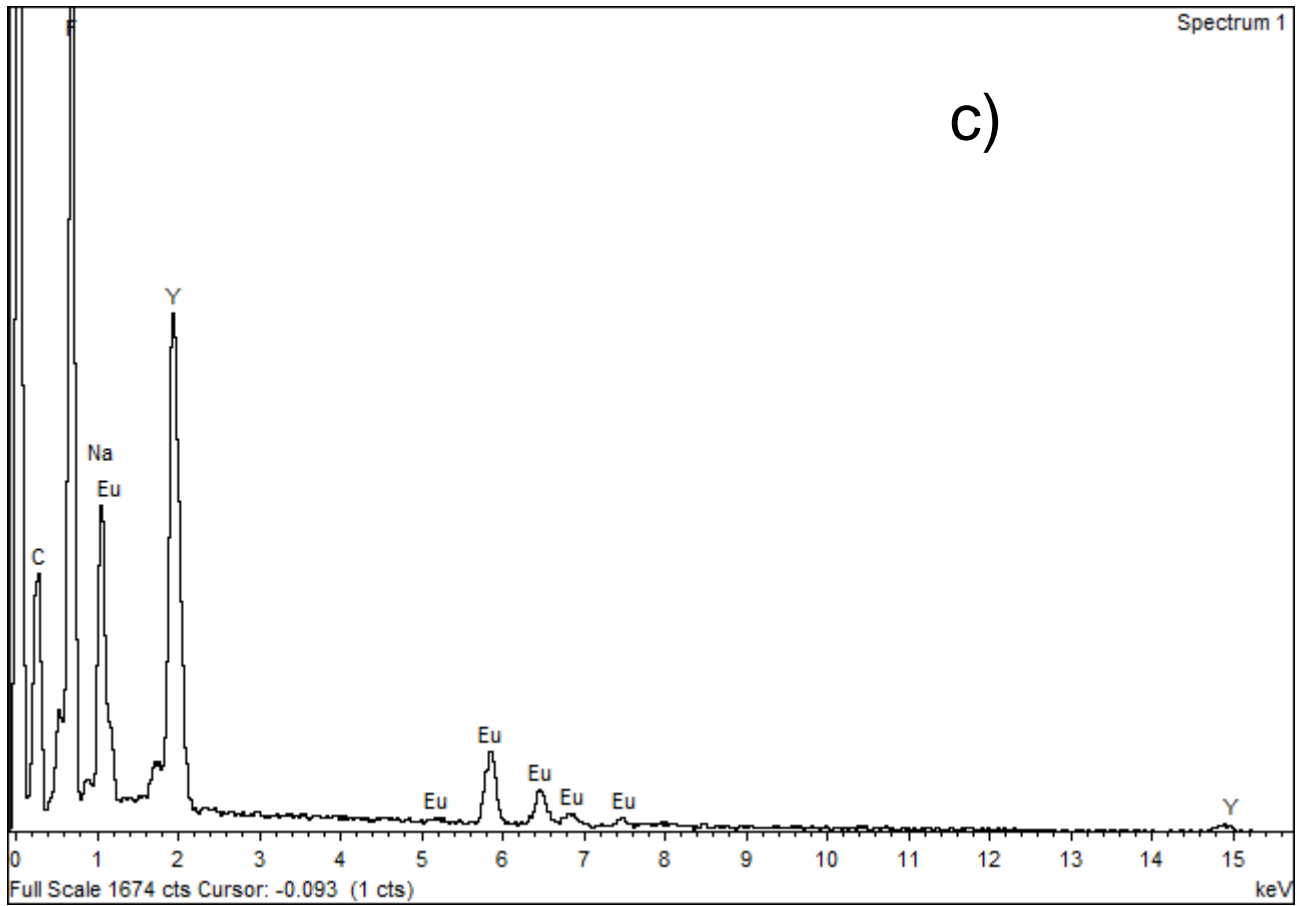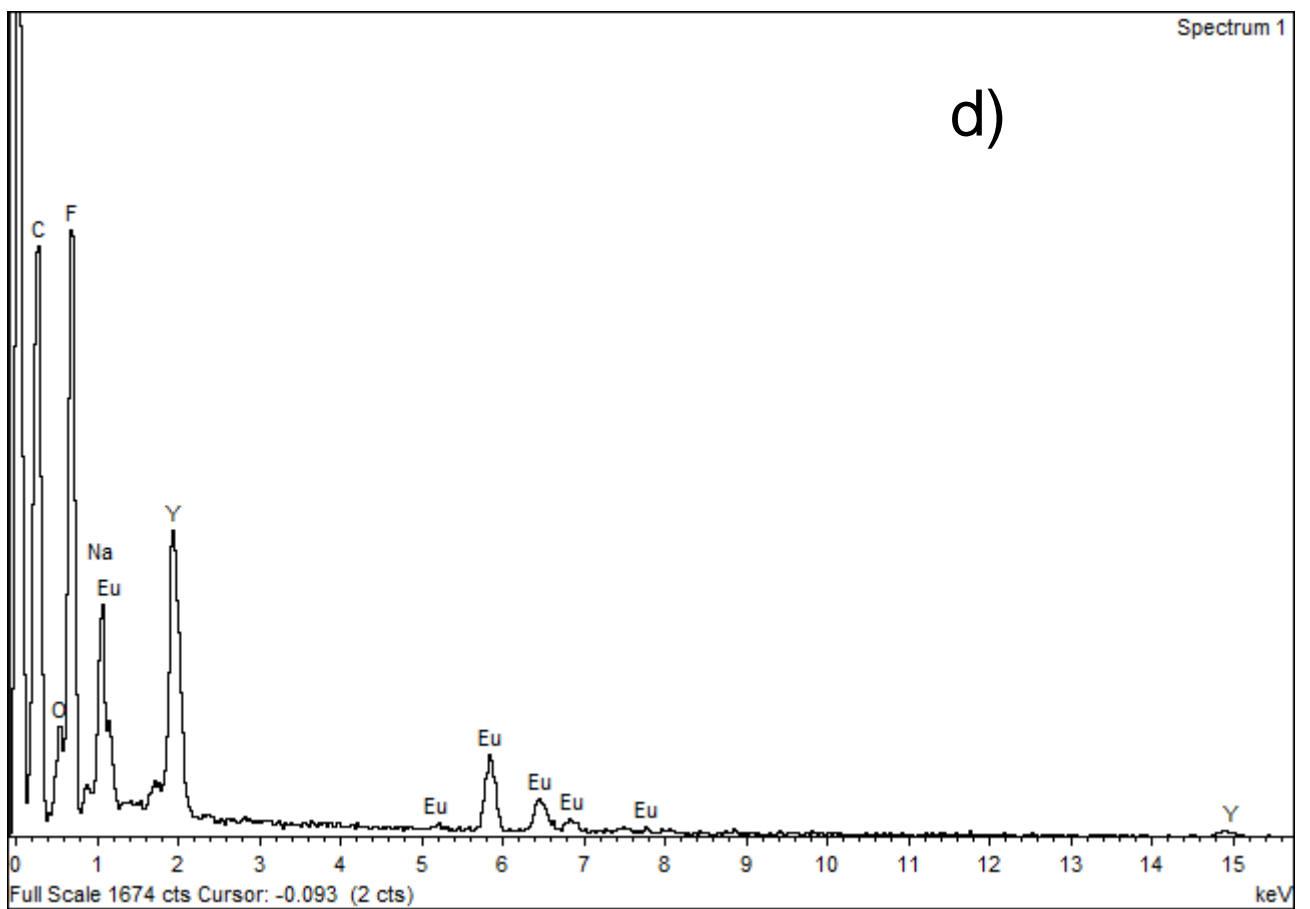

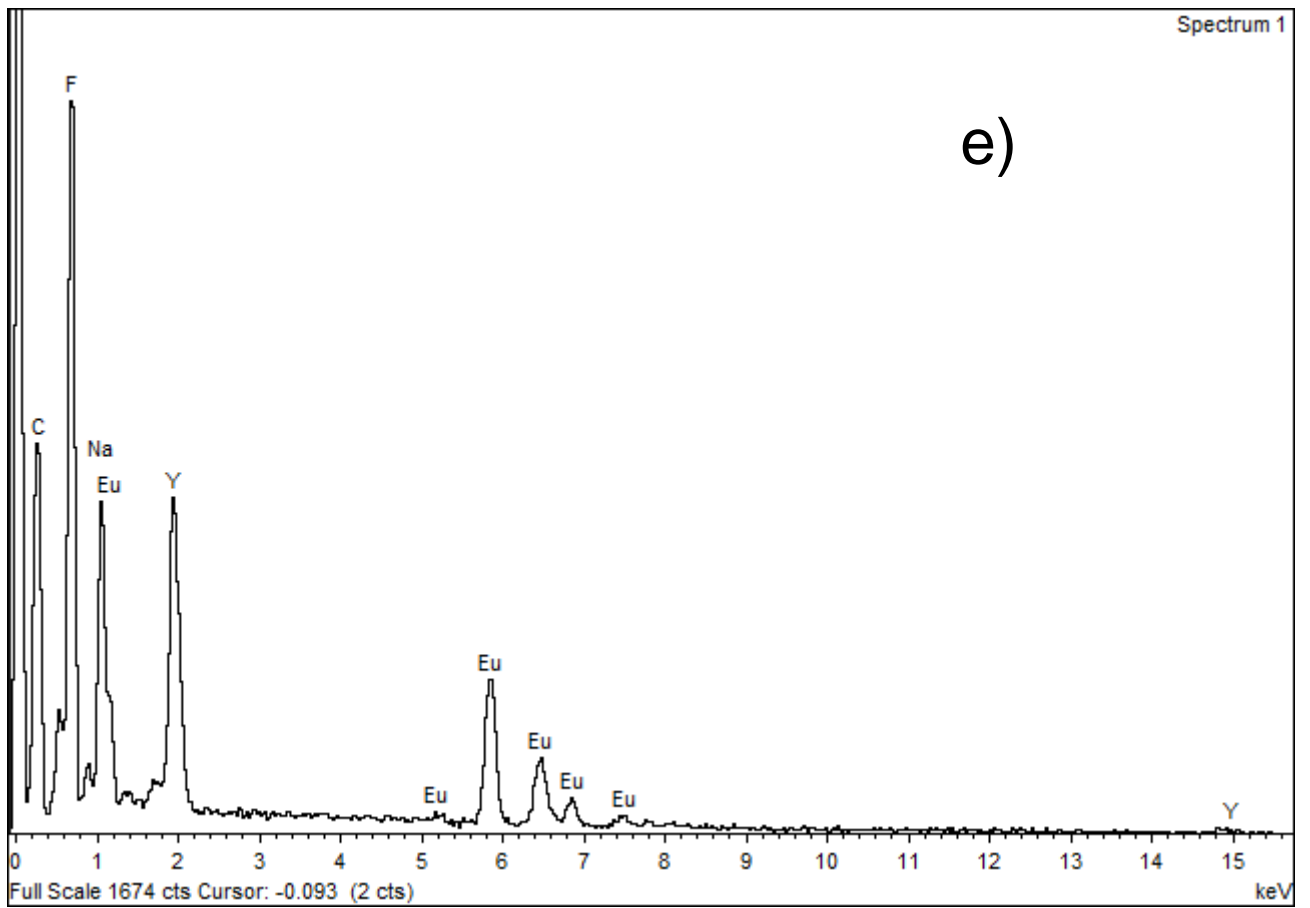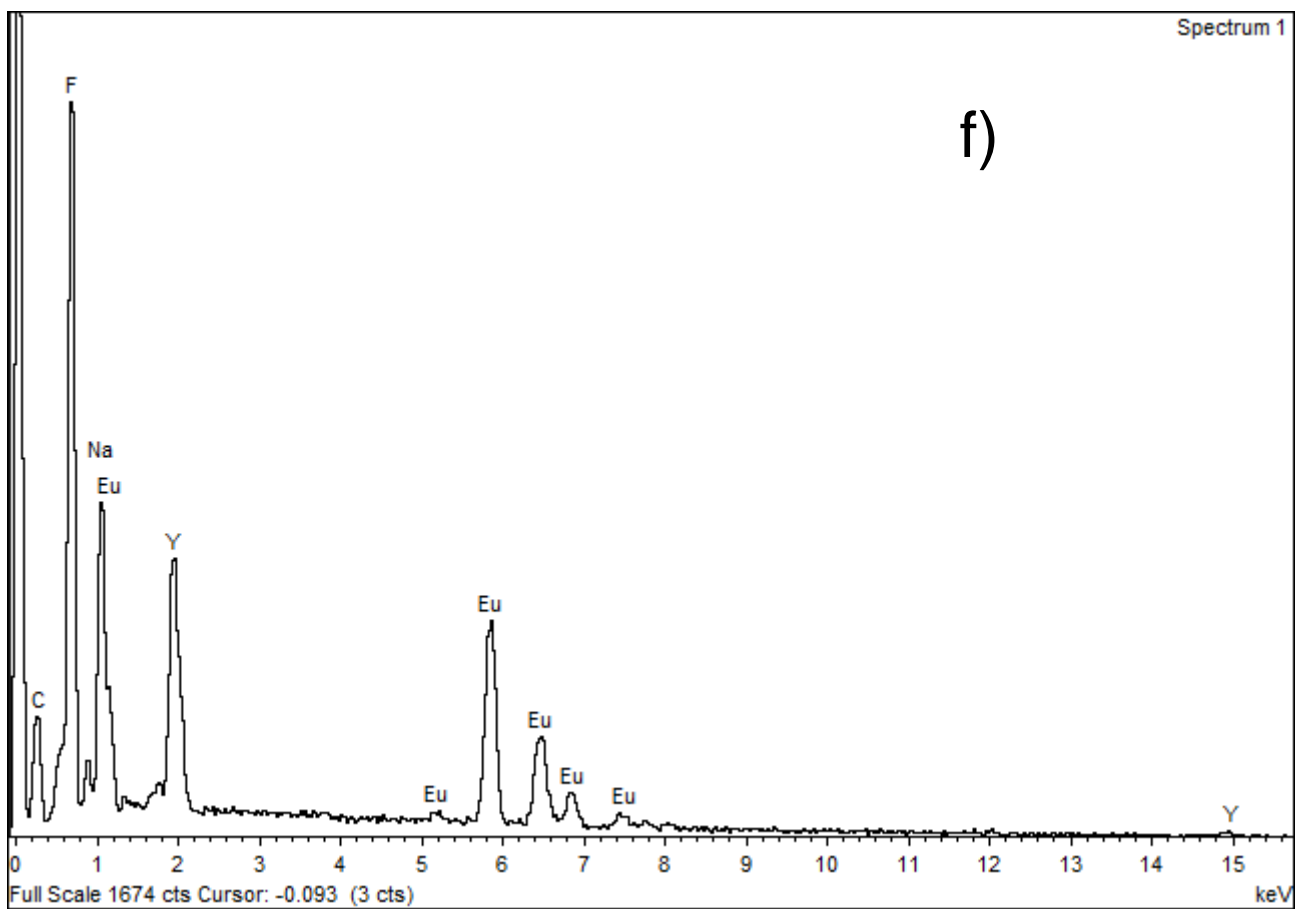

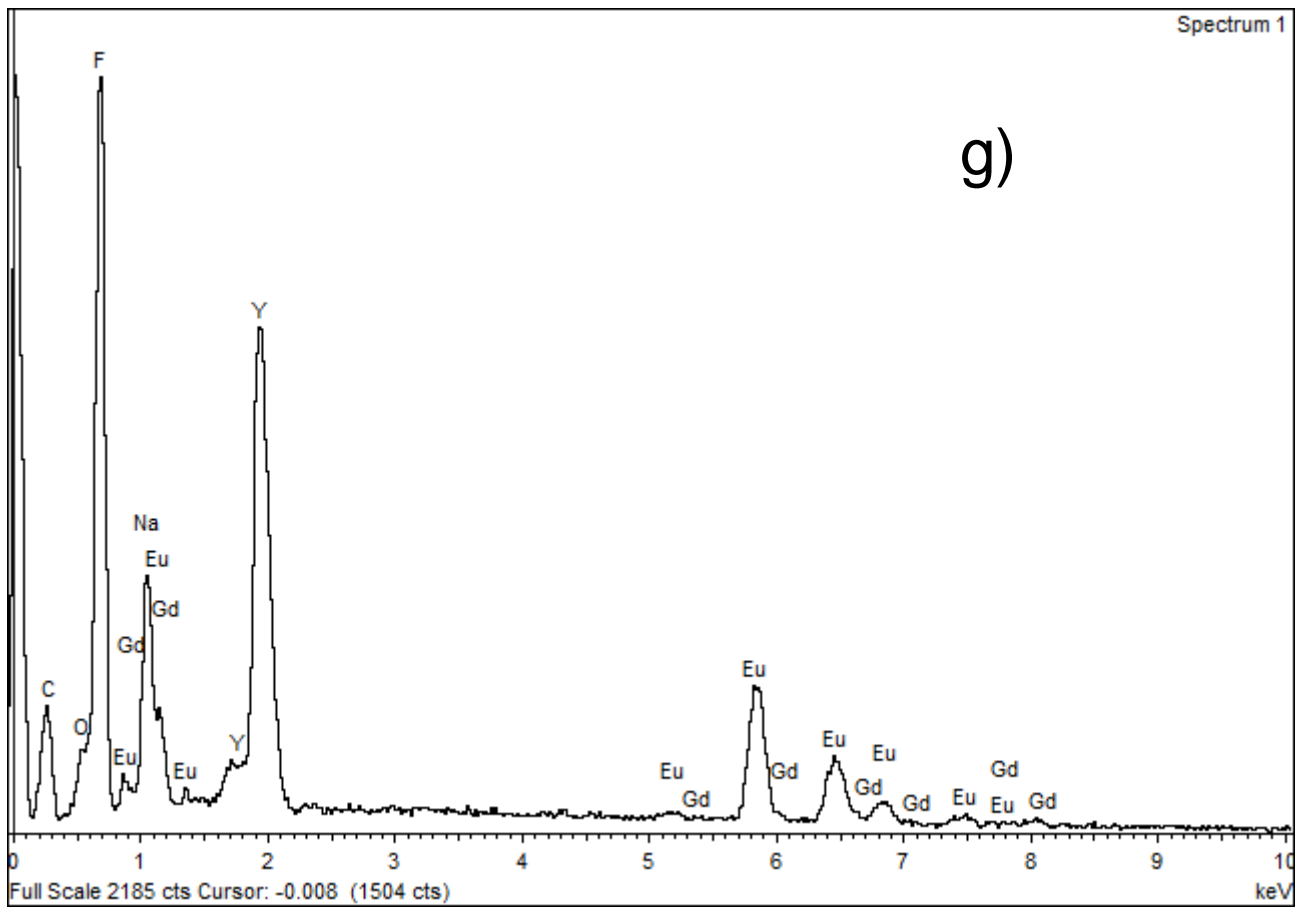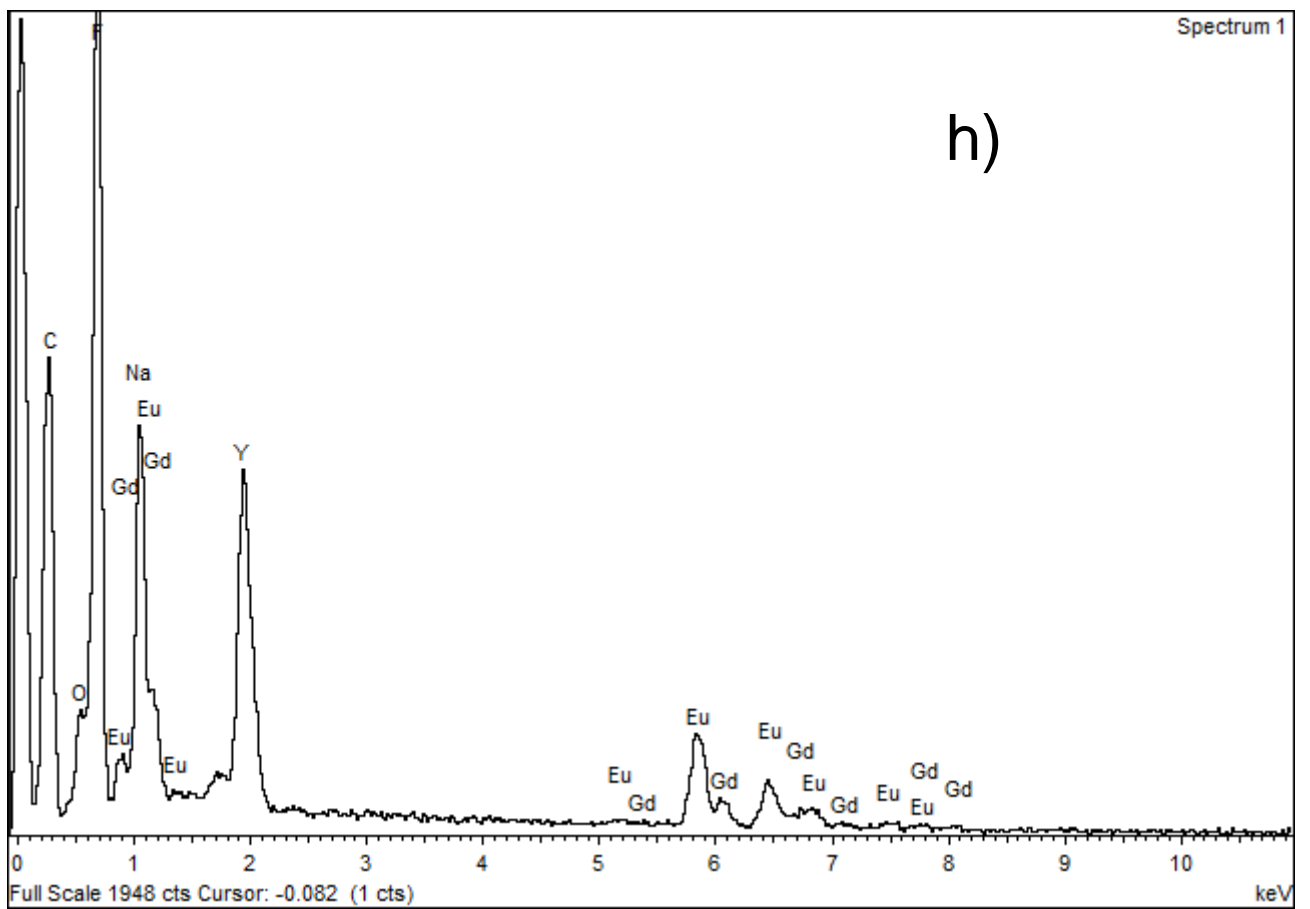

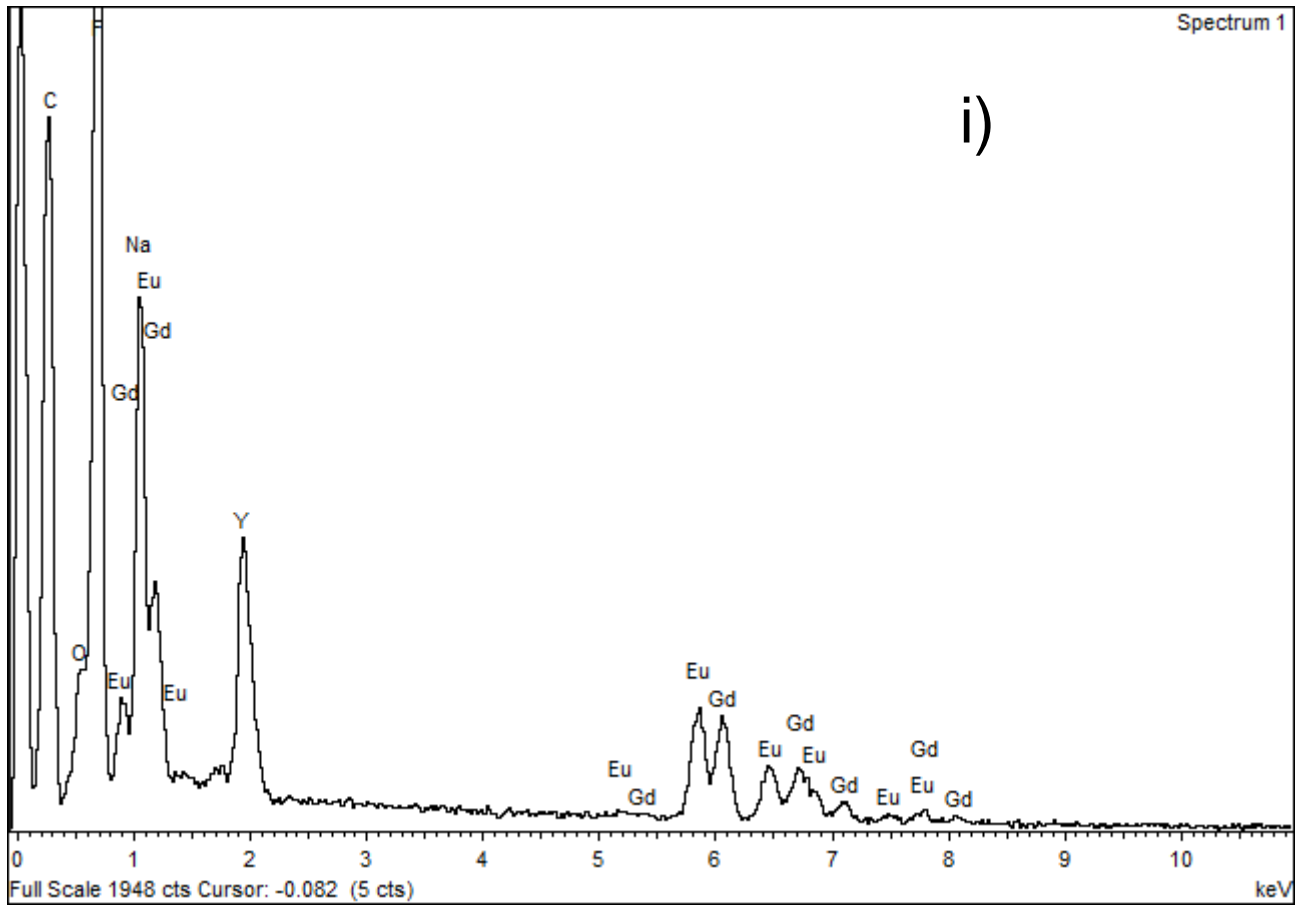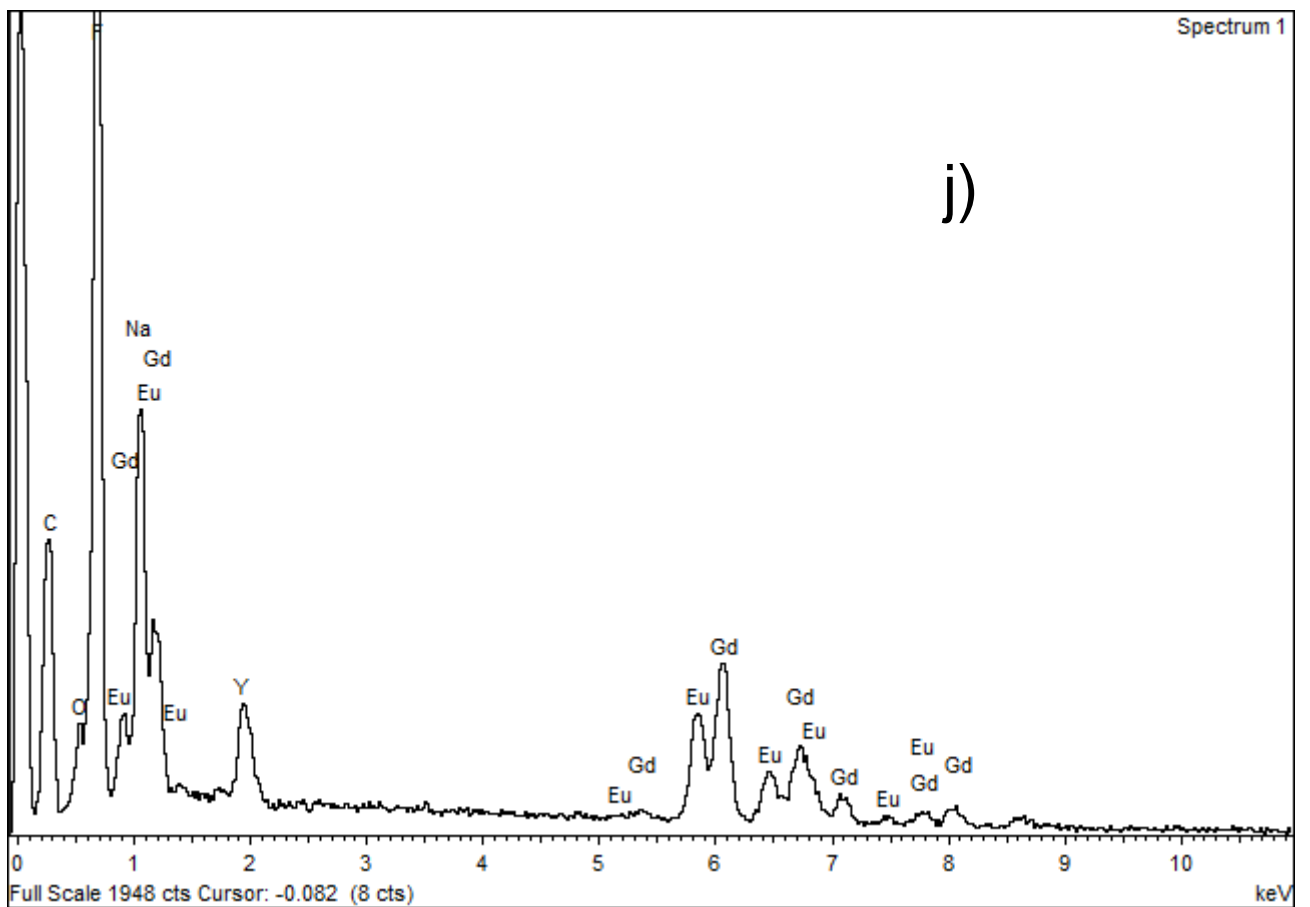

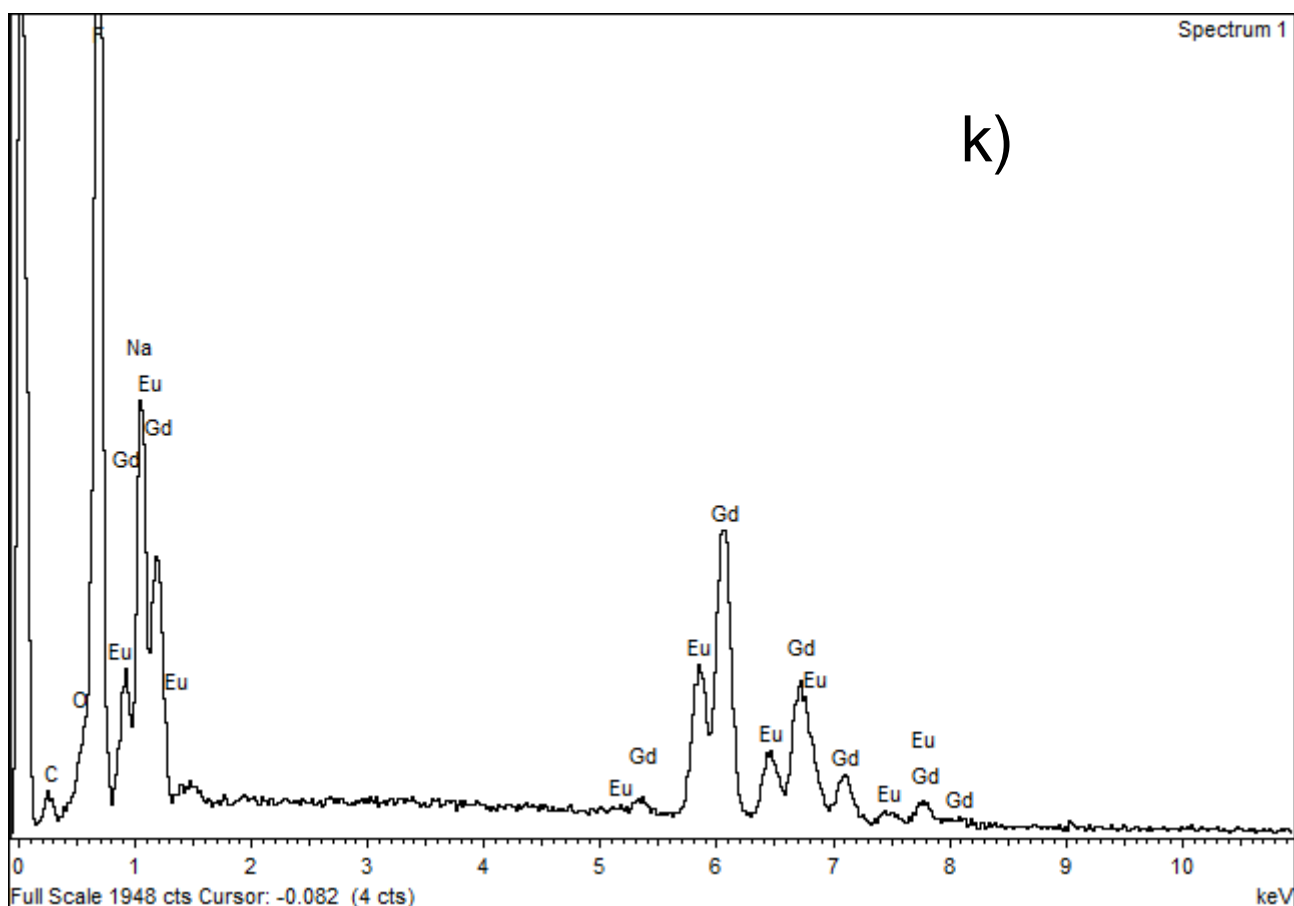

**Fig. S1.** EDX spectra of the samples: a) NaYF<sub>4</sub>: 0% Eu, b) NaYF<sub>4</sub>: 10% Eu, c) NaYF<sub>4</sub>: 20% Eu, d) NaYF<sub>4</sub>: 30% Eu, e) NaYF<sub>4</sub>: 40% Eu, f) NaYF<sub>4</sub>: 50% Eu, g) NaYF<sub>4</sub>: 30% Eu, 1% Gd, h) NaYF<sub>4</sub>: 30% Eu, 10% Gd, i) NaYF<sub>4</sub>: 30% Eu, 30% Gd, j) NaYF<sub>4</sub>: 30% Eu, 50% Gd, k) NaYF<sub>4</sub>: 30% Eu, 70% Gd.

**Table S1.** The content of rare earth elements in the samples extracted from EDX spectra. The concentration of elements is shown relative to the total amount of rear earth elements.

| Sample                             | C(Y <sup>3+</sup> ), at. % | C(Eu <sup>3+</sup> ), at. % | C(Gd <sup>3+</sup> ), at. % |
|------------------------------------|----------------------------|-----------------------------|-----------------------------|
| NaYF <sub>4</sub>                  | 100                        | 0                           | 0                           |
| NaYF <sub>4</sub> : 10% Eu         | 91±2%                      | 9±2%                        | 0                           |
| NaYF <sub>4</sub> : 20% Eu         | 81±2%                      | 19±2%                       | 0                           |
| NaYF <sub>4</sub> : 30% Eu         | 73±3%                      | 27±3%                       | 0                           |
| NaYF <sub>4</sub> : 40% Eu         | 62±3%                      | 38±3%                       | 0                           |
| NaYF <sub>4</sub> : 50% Eu         | 51±3%                      | 49±3%                       | 0                           |
| NaYF <sub>4</sub> : 30% Eu, 1% Gd  | 67±3%                      | 31±3%                       | 2±1                         |
| NaYF <sub>4</sub> : 30% Eu, 10% Gd | 63±3%                      | 27±3%                       | 10±2%                       |
| NaYF <sub>4</sub> : 30% Eu, 30% Gd | 42±3%                      | 28±5%                       | 30±5%                       |
| NaYF <sub>4</sub> : 30% Eu, 50%    | 24±3%                      | 27±3%                       | 49±3%                       |
| NaYF <sub>4</sub> : 30% Eu, 70% Gd | 0                          | 28±3%                       | 72±3%                       |

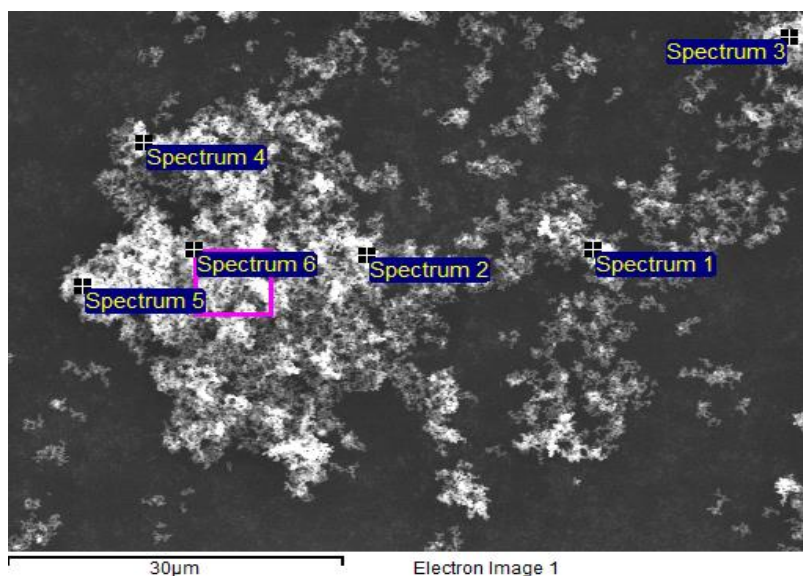

**Fig. S2.** SEM images of NaYF<sub>4</sub>: Eu<sup>3+</sup> 30% sample. The EDX spectra were measure at the several points marked as Spectrum 1 – 6.

**Table S2.** The distribution of elements among the NaYF<sub>4</sub>: Eu<sup>3+</sup> 30% sample (Fig. S2) obtained from EDX spectra.

| Sample     | C(Na), at. % | C(Y), at. % | C(Eu), at. % | C(F), at. % |
|------------|--------------|-------------|--------------|-------------|
| Spectrum 1 | 10.8         | 6.8         | 2.6          | 79.8        |
| Spectrum 2 | 12.7         | 7.1         | 2.6          | 77.5        |
| Spectrum 3 | 11.6         | 6.3         | 2.3          | 79.8        |
| Spectrum 4 | 10.7         | 6.0         | 2.2          | 81.1        |
| Spectrum 5 | 11.4         | 7.2         | 2.8          | 78.5        |
| Spectrum 6 | 14.0         | 7.0         | 2.7          | 76.3        |
| Mean       | 11.9         | 6.8         | 2.5          | 78.8        |
| St. dev.   | 1.3          | 0.5         | 0.2          | 1.8         |



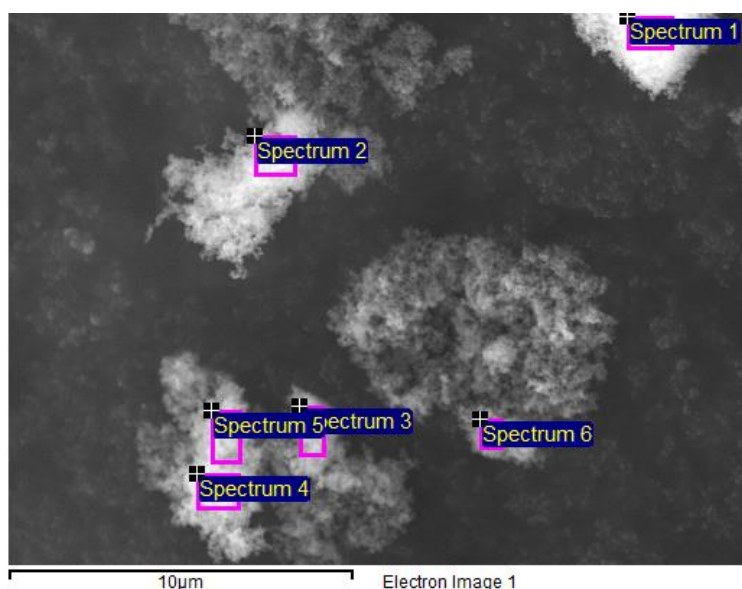

**Fig. S3.** SEM images NaYF<sub>4</sub>:Eu<sup>3+</sup> 30%, Gd<sup>3+</sup> 30% sample. The EDX spectra were measured at the several points marked as Spectrum 1 – 6.

**Table S3.** The distribution of elements among the NaYF<sub>4</sub>: Eu<sup>3+</sup> 30%, Gd<sup>3+</sup> 30% sample (Fig. S3) obtained from EDX spectra.

| Sample     | C(Na), at. % | C(Y), at. % | C(Eu), at. % | C(Gd), at. % | C(F), at. % |
|------------|--------------|-------------|--------------|--------------|-------------|
| Spectrum 1 | 14.4         | 4.1         | 2.3          | 2.6          | 76.6        |
| Spectrum 2 | 13.9         | 5.0         | 3.4          | 3.6          | 77.7        |
| Spectrum 3 | 15.0         | 4.6         | 2.7          | 3.0          | 77.7        |
| Spectrum 4 | 13.6         | 4.6         | 3.4          | 3.6          | 78.5        |
| Spectrum 5 | 14.8         | 4.6         | 3.3          | 3.5          | 77.2        |
| Spectrum 6 | 13.9         | 3.7         | 2.3          | 2.4          | 80.1        |
| Mean       | 14.3         | 4.4         | 2.9          | 3.1          | 78.0        |
| St. dev.   | 0.5          | 0.5         | 0.5          | 0.5          | 1.2         |

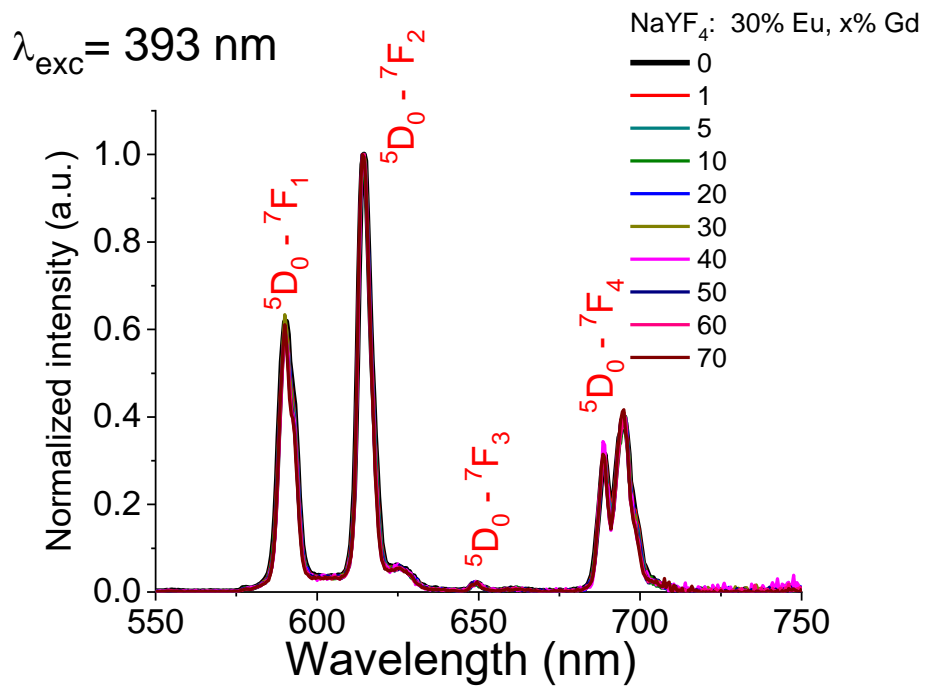

**Fig. S4.** Emission spectra of NaYF<sub>4</sub>:Eu<sup>3+</sup> 30%, Gd<sup>3+</sup> concentration series ( $\lambda_{\text{ex}} = 393 \text{ nm}$ ) normalized by the maximal intensity.
